# Supplementary material for: Atomic scale deposition of Pt around Au nanoparticles to achieve much enhanced electrocatalysis of Pt
Source: Royal Society of Chemistry journal article supplement (doi:10.1039/c7nr02711g), 2017-01-01
Supplement: c7nr02711g1.pdf [file c7nr02711g1.pdf]

## Supporting Information

### **Atomic Scale Deposition of Pt around Au Nanoparticles to Achieve Much Enhanced Electrocatalysis of Pt**

Zheng Xi,<sup>a,†</sup> Haifeng Lv,<sup>a,†,‡</sup> Daniel P. Erdosy,<sup>a</sup> Dong Su,<sup>b</sup> Qing Li,<sup>c</sup> Chao Yu,<sup>a</sup> Junrui Li<sup>a</sup> and Shouheng Sun<sup>a,\*</sup>

<sup>a</sup> Department of Chemistry, Brown University, Providence, Rhode Island 02912, United States

<sup>b</sup> Center for Functional Nanomaterials, Brookhaven National Laboratory, Upton, New York 11973, United States

<sup>c</sup> School of Materials Science and Engineering, Huazhong University of Science and Technology, Wuhan, Hubei 430074, P. R. China

<sup>‡</sup> Present Address: Materials Science Division, Argonne National Laboratory, Argonne, Illinois 60439, United States

<sup>†</sup> These authors contributed equally

\* To whom correspondence should be addressed

E-mail: [ssun@brown.edu](mailto:ssun@brown.edu)

#### **➤ Experimental section**

##### **Chemicals and Materials**

Hydrogen tetrachloroaurate (III) hydrate ( $\text{HAuCl}_4 \cdot 3\text{H}_2\text{O}$ ) was purchased from Strem Chemicals. Oleylamine (>70%), 1,2,3,4-tetrahydronaphthalene (tetralin), borane *t*-butylamine complex (TBAB) and Nafion solution (5% in a mixture of lower aliphatic alcohols and water) were purchased from Sigma Aldrich. Hexane (98.5%), ethanol (99%), 2-propanol (99%), perchloric acid (70%), formic acid (88%) and sulfuric acid (98%) were from Fisher Scientific. The commercial C-Pt catalyst (20% mass loading, Pt particle size 2-3 nm in diameter) was obtained from Fuel Cell Store. Deionized water was from a Millipore Autopure system. All reagents were of analytical grade and used without further purification.

##### **Synthesis and Characterizations**

**Synthesis of 5 nm Au NPs.** These NPs were prepared according to the method published previously<sup>1</sup>. Briefly, 0.2 g  $\text{HAuCl}_4$  was dissolved in 10 ml of tetralin and 10 ml of OAm at 4 °C under  $\text{N}_2$  flow and vigorous magnetic stirring. 0.5 mmol TBAB was dissolved in 1 ml of tetralin and 1 ml of OAm *via* sonication. The solution was then injected into the  $\text{HAuCl}_4$  solution when the temperature is below 4 °C. The mixed solution was then stirred for 2 h at 4 °C before 40 ml of acetone was added to collect Au NPs *via* centrifugation (8500 rpm, 8 min). The product was dispersed in 20 ml hexane, precipitated out by adding 40 ml of ethanol and centrifugation, and re-dispersed in hexane.

**Catalyst Preparation.** 10 mg Au NPs were drop-wise deposited onto 10 mg KetjenBlack EC-300-J carbon by sonicating the mixture of Au NP dispersion in hexane and C, giving C-Au. The C-Au was annealed overnight in air at 150 °C to remove the surfactant. After cooling down to room temperature, the C-Au was suspended in a mixture of deionized water, isopropanol and Nafion (V/V/V=4/1/0.05) to form a catalyst ink (2 mg/mL). For each test, 20  $\mu$ L of the catalyst ink was deposited on a newly polished glassy carbon rotating disk electrode (GC-RDE) (0.196 cm<sup>2</sup>) and dried in ambient conditions. For each sample, the Au catalyst mass loading was kept at 0.1 mg<sub>Au</sub>/cm<sup>2</sup>.

**Characterizations.** Transmission electron microscopy (TEM) images were acquired from a Philips CM20 (200 kV). X-ray diffraction (XRD) patterns were collected on a Bruker AXS D8-Advanced diffractometer (Cu K $\alpha$   $\lambda$ =1.5418 Å). The inductively coupled plasma-atomic emission spectroscopy (ICP-AES) was measured by a JY2000 Ultrace ICP atomic emission spectrometer equipped with a JYAS 421 autosampler and 2400 g/mm holographic grating. Scanning transmission electron microscopy (STEM) analyses were carried out on a Hitachi HD2700C (200 kV) with a probe aberration corrector, at the Center for Functional Nanomaterials, Brookhaven National Lab. The electron energy loss spectroscopy (EELS) line-scan was obtained by a high-resolution Gatan-Enfina ER with a probe size of 1.3 Å. A power law function was used for EELS background subtraction.

**Electrochemical Measurements.** Electrochemical measurements were carried out on an Autolab 302 potentiostat (Eco Chemie B.V, Holland) with GC-RDE (catalyst loading area: 0.196 cm<sup>2</sup>) as a working electrode (W.E.), Ag/AgCl (4 M KCl) as a reference electrode (R.E.), and a Pt wire (commercial source, separate Pt-wire electrode, 0.8 x 6 mm, exposed Pt wire surface area: 15.57 mm<sup>2</sup>) as a counter electrode (C.E.). The distances between C.E., W.E. and R.E. are kept same as 1.5 cm (see the set-up photo below). The reference electrode was calibrated to reversible hydrogen electrode (RHE) before the measurements and all potentials were converted to the RHE scale ( $V_{\text{Ag/AgCl}} + 0.26 \text{ V} = V_{\text{RHE}}$  in 0.1 M HClO<sub>4</sub> solution,  $V_{\text{Ag/AgCl}} + 0.223 \text{ V} = V_{\text{RHE}}$  in 0.5 M H<sub>2</sub>SO<sub>4</sub> solution). The atomic scale Pt deposition was carried out for the C-Au NPs under cyclic voltammetry potential cycling from different voltage ranges and different cycling numbers in 50 mL N<sub>2</sub>-saturated 0.5 M H<sub>2</sub>SO<sub>4</sub> electrolyte solution with a constant scan rate of 100 mV/s. After the Pt deposition, the electrolyte solution was changed according to different electrochemical catalysis. The FAOR CVs were obtained from 0 to 1.2 V in 50 mL N<sub>2</sub>-saturated 0.1 M HClO<sub>4</sub> + 0.1 M HCOOH with a scan rate of 50 mV/s. The HER LSVs were obtained in 50 mL N<sub>2</sub>-saturated 0.5 M H<sub>2</sub>SO<sub>4</sub> with a scan rate of 2 mV/s and rotation speed at 1600 rpm. 10 h Chronoamperometry i-t test for the stability test was carried out at the constant potential of 0.4 V in 50 mL 0.1 M HClO<sub>4</sub> + 0.1 M HCOOH (FAOR) with the electrode rotation speed at 1000 rpm. In the CO stripping test, the catalyst was first immersed in the 50 mL CO-saturated 0.1 M HClO<sub>4</sub> at 0.1 V for 20 min to form a CO adsorption layer on Pt surface. Then N<sub>2</sub> was purged into solution for 20 min to get rid of remaining CO in solution. CO stripping CV was performed from 0 - 1.2 V with a scan rate of 20 mV/s. The ECSA was calculated by a conversion factor of 420  $\mu$ C/cm<sup>2</sup>.<sup>2</sup>

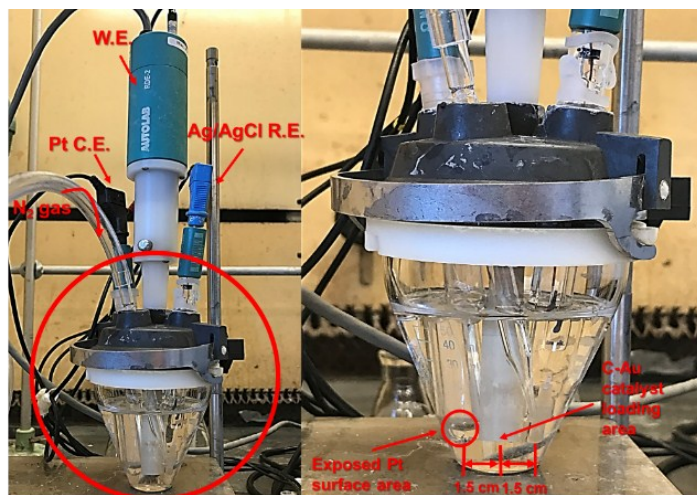

## References

1. Zhu, W.; Michalsky, R.; Metin, O.; Lv, H.; Guo, S.; Wright, C. J.; Sun, X.; Peterson, A. A.; Sun, S. *J. Am. Chem. Soc.* **2013**, *135*, 16833-16836.
2. Wang, G.; Huang, B.; Xiao, L.; Ren, Z.; Chen, H.; Wang, D.; Abruna, H. D.; Lu, J.; Zhuang, L. *J. Am. Chem. Soc.* **2014**, *136*, 9643-8649.

## ➤ Figures

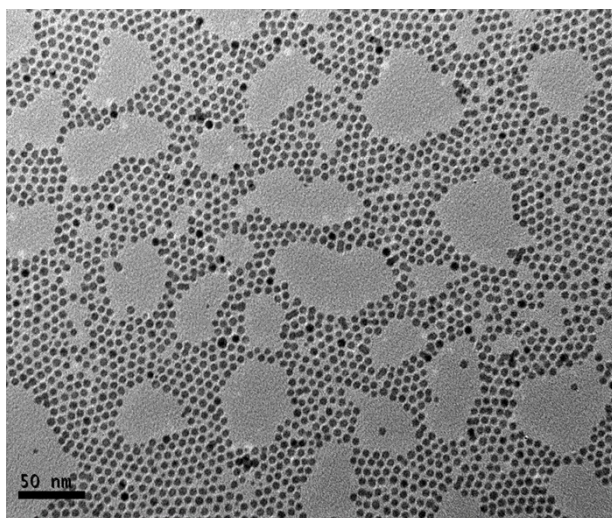

**Figure S1.** TEM image of the as-synthesized 5 nm Au NPs.

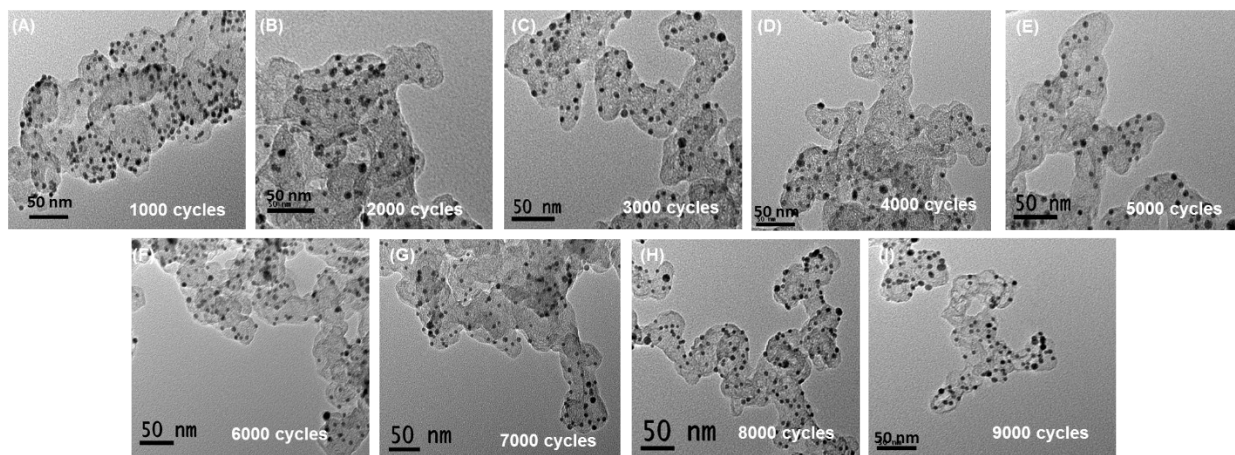

**Figure S2.** TEM images of the Au NPs after different numbers of CV cycling from 0.6 V to 1.0 V (vs. RHE): (A) 1000, (B) 2000, (C) 3000, (D) 4000, (E) 5000, (F) 6000, (G) 7000, (H) 8000, and (I) 9000.

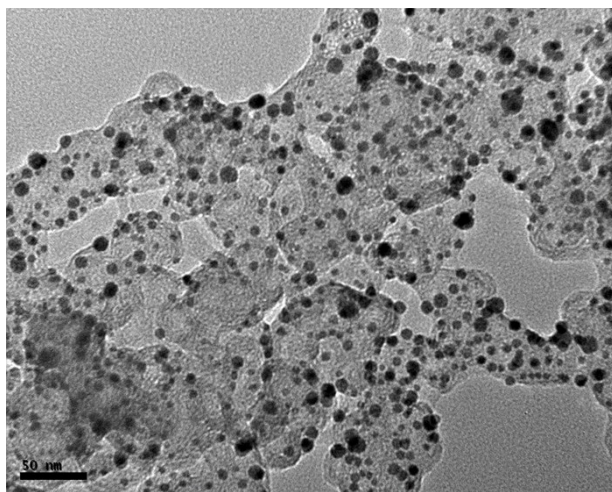

**Figure S3.** TEM image of the Au NPs after 11000 CV cycling between 0.6 V to 1.0 V (vs. RHE).

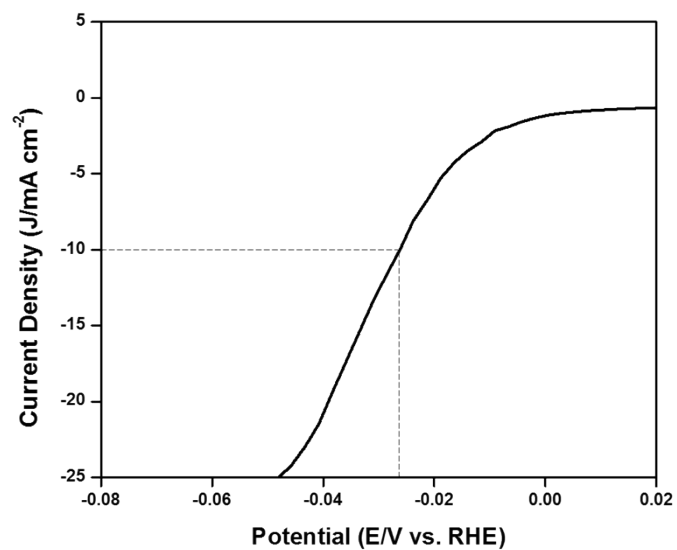

**Figure S4.** HER polarization curve of the commercial C-Pt (20 wt%). Scan rate: 2 mV/s.

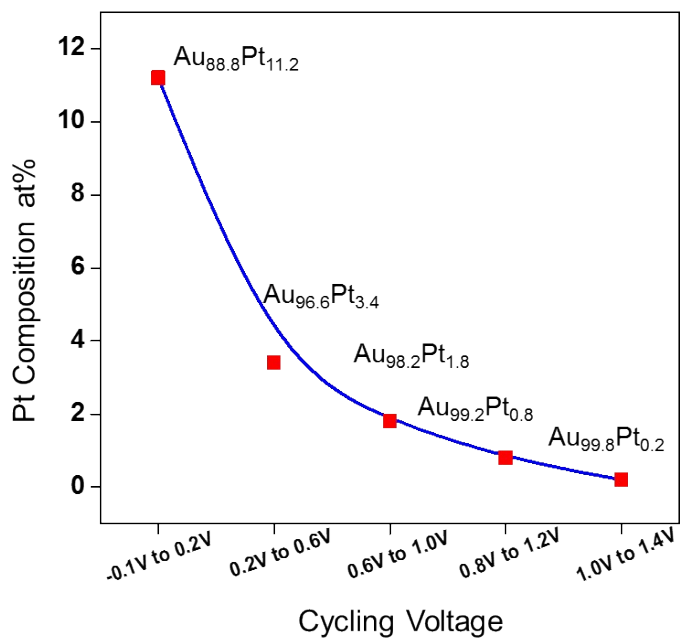

**Figure S5.** Pt composition change after 10000 potential cycling from different potential ranges. Scan rate 100 mV/s.

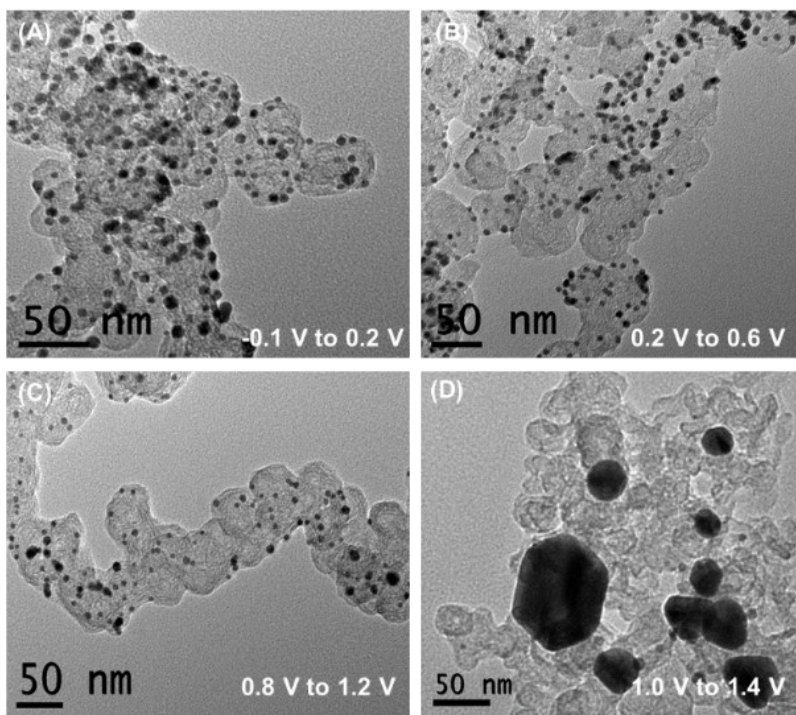

**Figure S6.** TEM images of Au NPs after cycling 10000 times from (A) -0.1 V to 0.2 V, (B) 0.2 V to 0.6 V, (C) 0.8 V to 1.2 V, (D) 1.0 V to 1.4 V. Scan rate 100 mV/s.

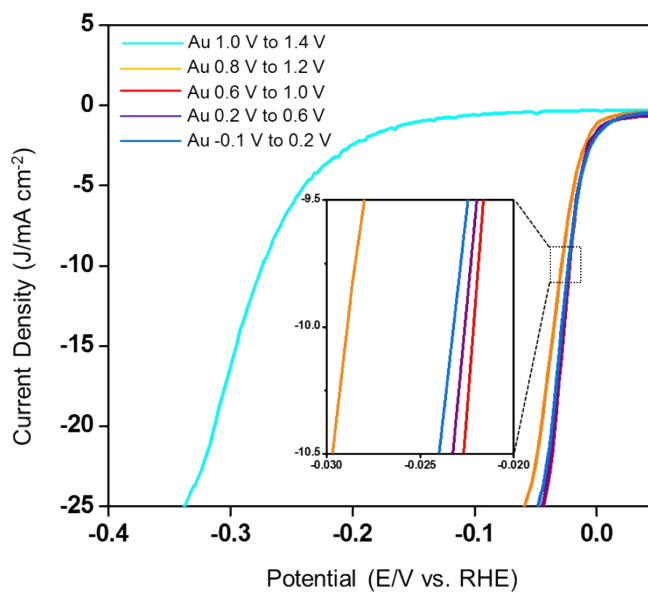

**Figure S7.** HER polarization curves of the Au NPs after 10000 potential cycling from different potential ranges (no iR correction). Scan rate: 2 mV/s.

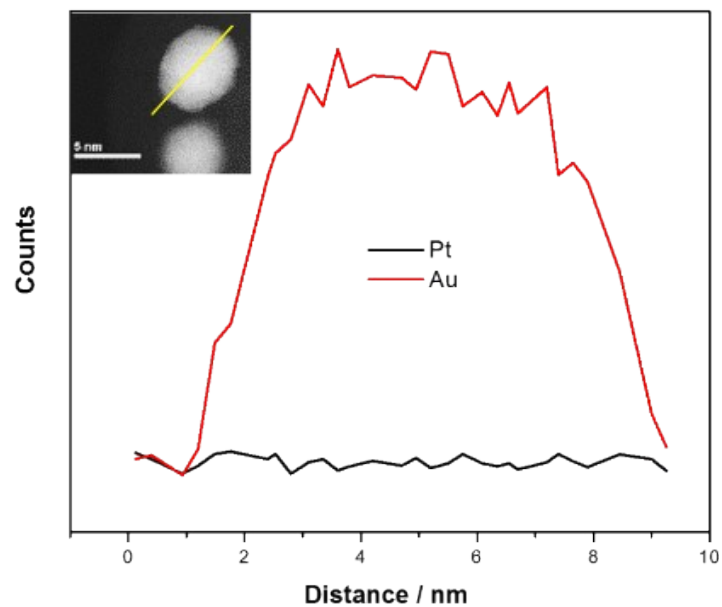

**Figure S8.** EELS-line scan of a single C-Au<sub>98.2</sub>Pt<sub>1.8</sub> NP.

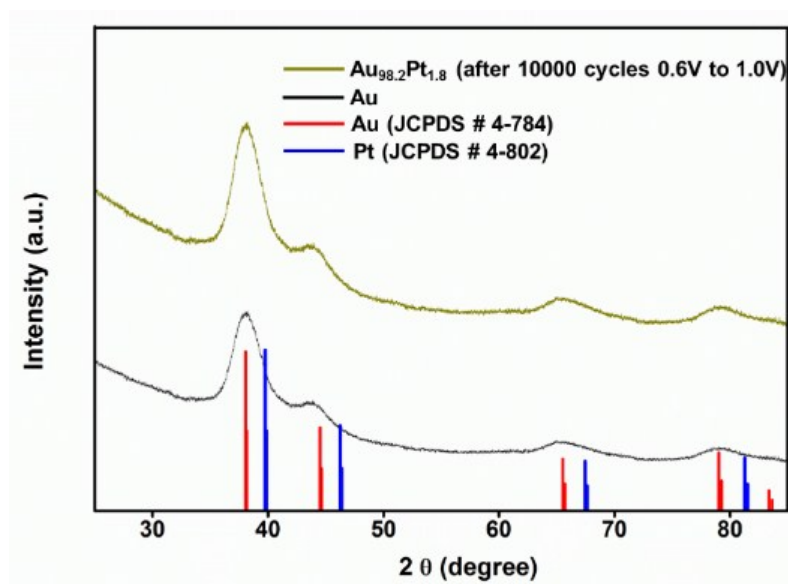

**Figure S9.** XRD of the Au NPs before and after 10000 CV cycles from 0.6 V to 1.0 V. Standard Peaks for Au (JCPDS # 4-784) and Pt (JCPDS # 4-802) are also shown.

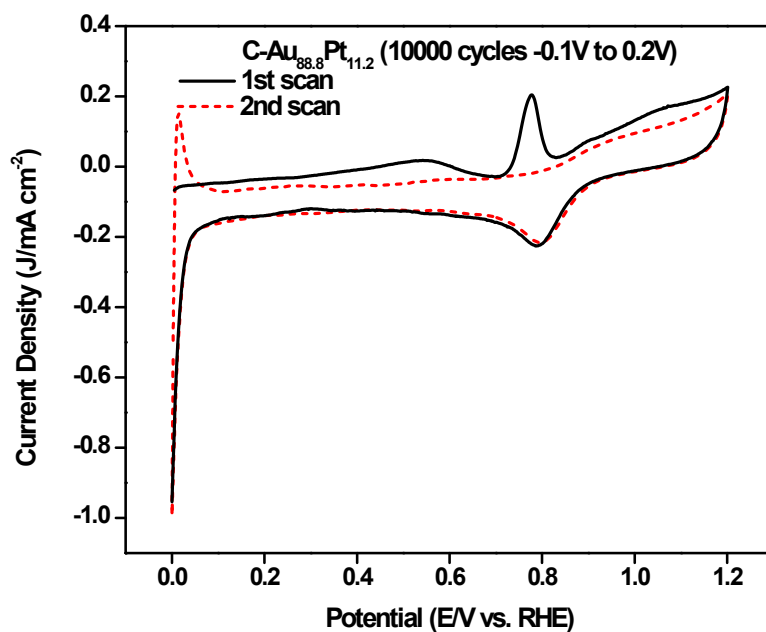

**Figure S10.** CO stripping for C-Au<sub>88.8</sub>Pt<sub>11.2</sub> obtained after 10000 cycles from -0.1 V to 0.2 V. Scan rate of 20 mV/s.

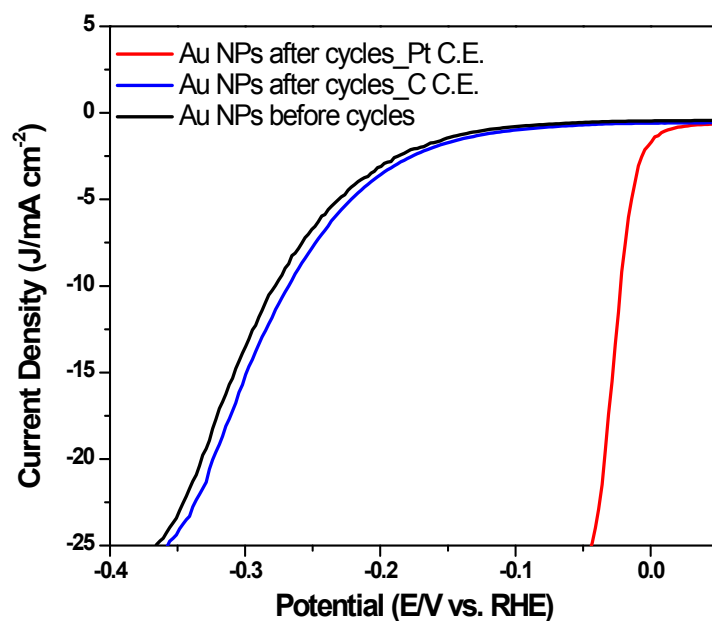

**Figure S11.** HER LSVs (in 0.5 M H<sub>2</sub>SO<sub>4</sub>, no iR correction) of the Au NPs before and after 10000 CV cycles from 0.6 V to 1.0 V by using Pt CE and graphite CE, respectively.

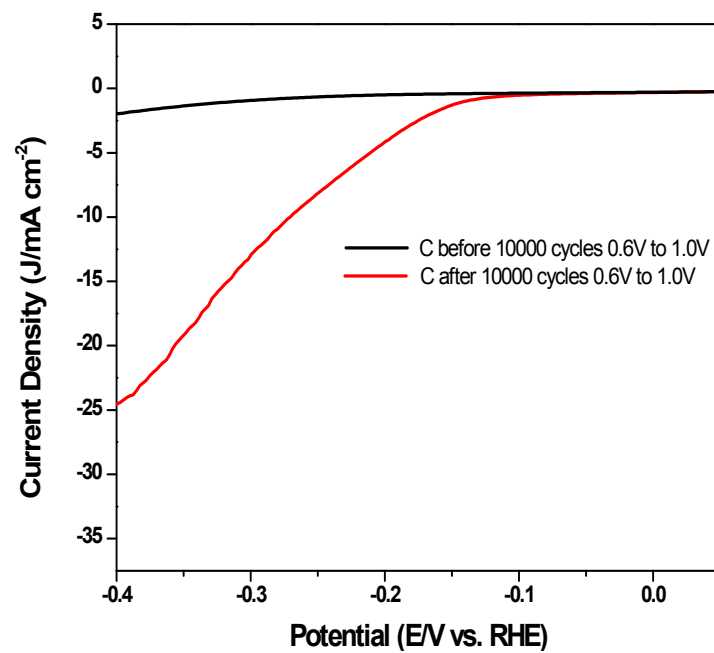

**Figure S12.** HER LSVs (in 0.5 M H<sub>2</sub>SO<sub>4</sub>, no iR correction) for pure carbon support before and after 10000 CV cycles from 0.6 V to 1.0 V by using Pt CE.
